# Supplementary material
Source: bioRxiv or medRxiv preprint supplement (https://www.biorxiv.org/highwire/filestream/12450/field_highwire_adjunct_files/0/045955-1.pdf)
Supplement: Supplementary file [file 045955-1.pdf]

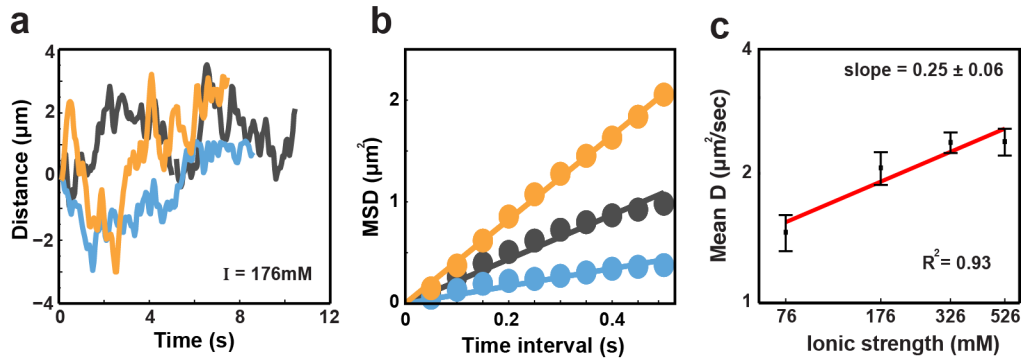

**Figure S1. Characterization of *S. cerevisiae* PCNA diffusion on  $\lambda$ -DNA.** (a) Representative single-molecule traces of the position of individual PCNA molecules (shown in three different colors) on DNA at a total ionic strength  $I=176$  mM. (b) Mean squared displacement (MSD) of each of the molecules in (a). The MSDs are fit to a line, and the slopes are used to calculate the one-dimensional diffusion coefficients (solid lines). (c) Mean PCNA diffusion coefficients as a function of the ionic strengths (error bars: S.E). The red line indicates a linear fit through the data as a function of the ionic strength. The slope of the linear regression estimates the number of screened charges between the PCNA ring and the DNA track (error: standard error of the fit). (N=30, 29, 29, 31 for 76 mM, 176 mM, 326 mM, and 525 mM ionic strengths, respectively).

**Table S1. Oligonucleotides**

| <b>Name</b>   | <b>Sequence</b>                                                    |
|---------------|--------------------------------------------------------------------|
| AD006         | TTTTTTTTTTTTTTTTTTTTTTTTTTTTTTTTTTTTTCTTCCCTTGGTGCGA<br>TCGCTCTTCG |
| AD012         | AGTCTGGATAGCCATAAGTG                                               |
| AD013         | GTAACCACATACTTCCTGCC                                               |
| AD016         | GCAGTCTGTCAGTCAGTGCG                                               |
| AD017         | CGAGGGCATTGCAGTAATTG                                               |
| AD022         | CGTTCATGGCTGAACTCCTG                                               |
| AD023         | CGGCATAACATGCAGTGGAC                                               |
| AD024         | GTGATGTTGCTGCGCTCGATG                                              |
| AD025         | CTCAGCCTGGGTCATTGAAG                                               |
| AD027         | GCTACCACCATGACTAACGC                                               |
| AD028         | GGATATCAGAGCTATGGCTC                                               |
| AD031         | CCGCGATTGCAGATGTTATC                                               |
| AD032         | CTATACAGCCAAGCTTGCAG                                               |
| MB032         | TGCATGCGGCCGCTCTTCCCATGGTGCGATCGCTCTTCG                            |
| IF003         | /5Phos/AGGTCGCCGCC/3BioTEG                                         |
| IF004         | /5Phos/GGGCGGCGACCT/3Dig_N                                         |
| YK_PCN<br>A01 | /5phs/GATGACGACAAGCATCATCAT                                        |
| YK_PCN<br>A02 | GTCTTTGTAGTCGCTGCTGCTGCCCATGGTAT                                   |
